# Supplementary material for: COVID-19 and the prevalence of drug shortages in Canada: a cross-sectional time-series analysis from April 2017 to April 2022
Source: PubMed Central journal article supplement — CMAJ. 2022 Jun 13;194(23):E801–6. doi: 10.1503/cmaj.212070 (PMC9262135; doi:10.1503/cmaj.212070), 2022-06-13
Supplement: 212070-res-1-at.pdf [file 212070-res-1-at.pdf]

**Appendix Figure. Cumulative total of drug portfolios listed for exceptional importation and sale on the Government of Canada website.**

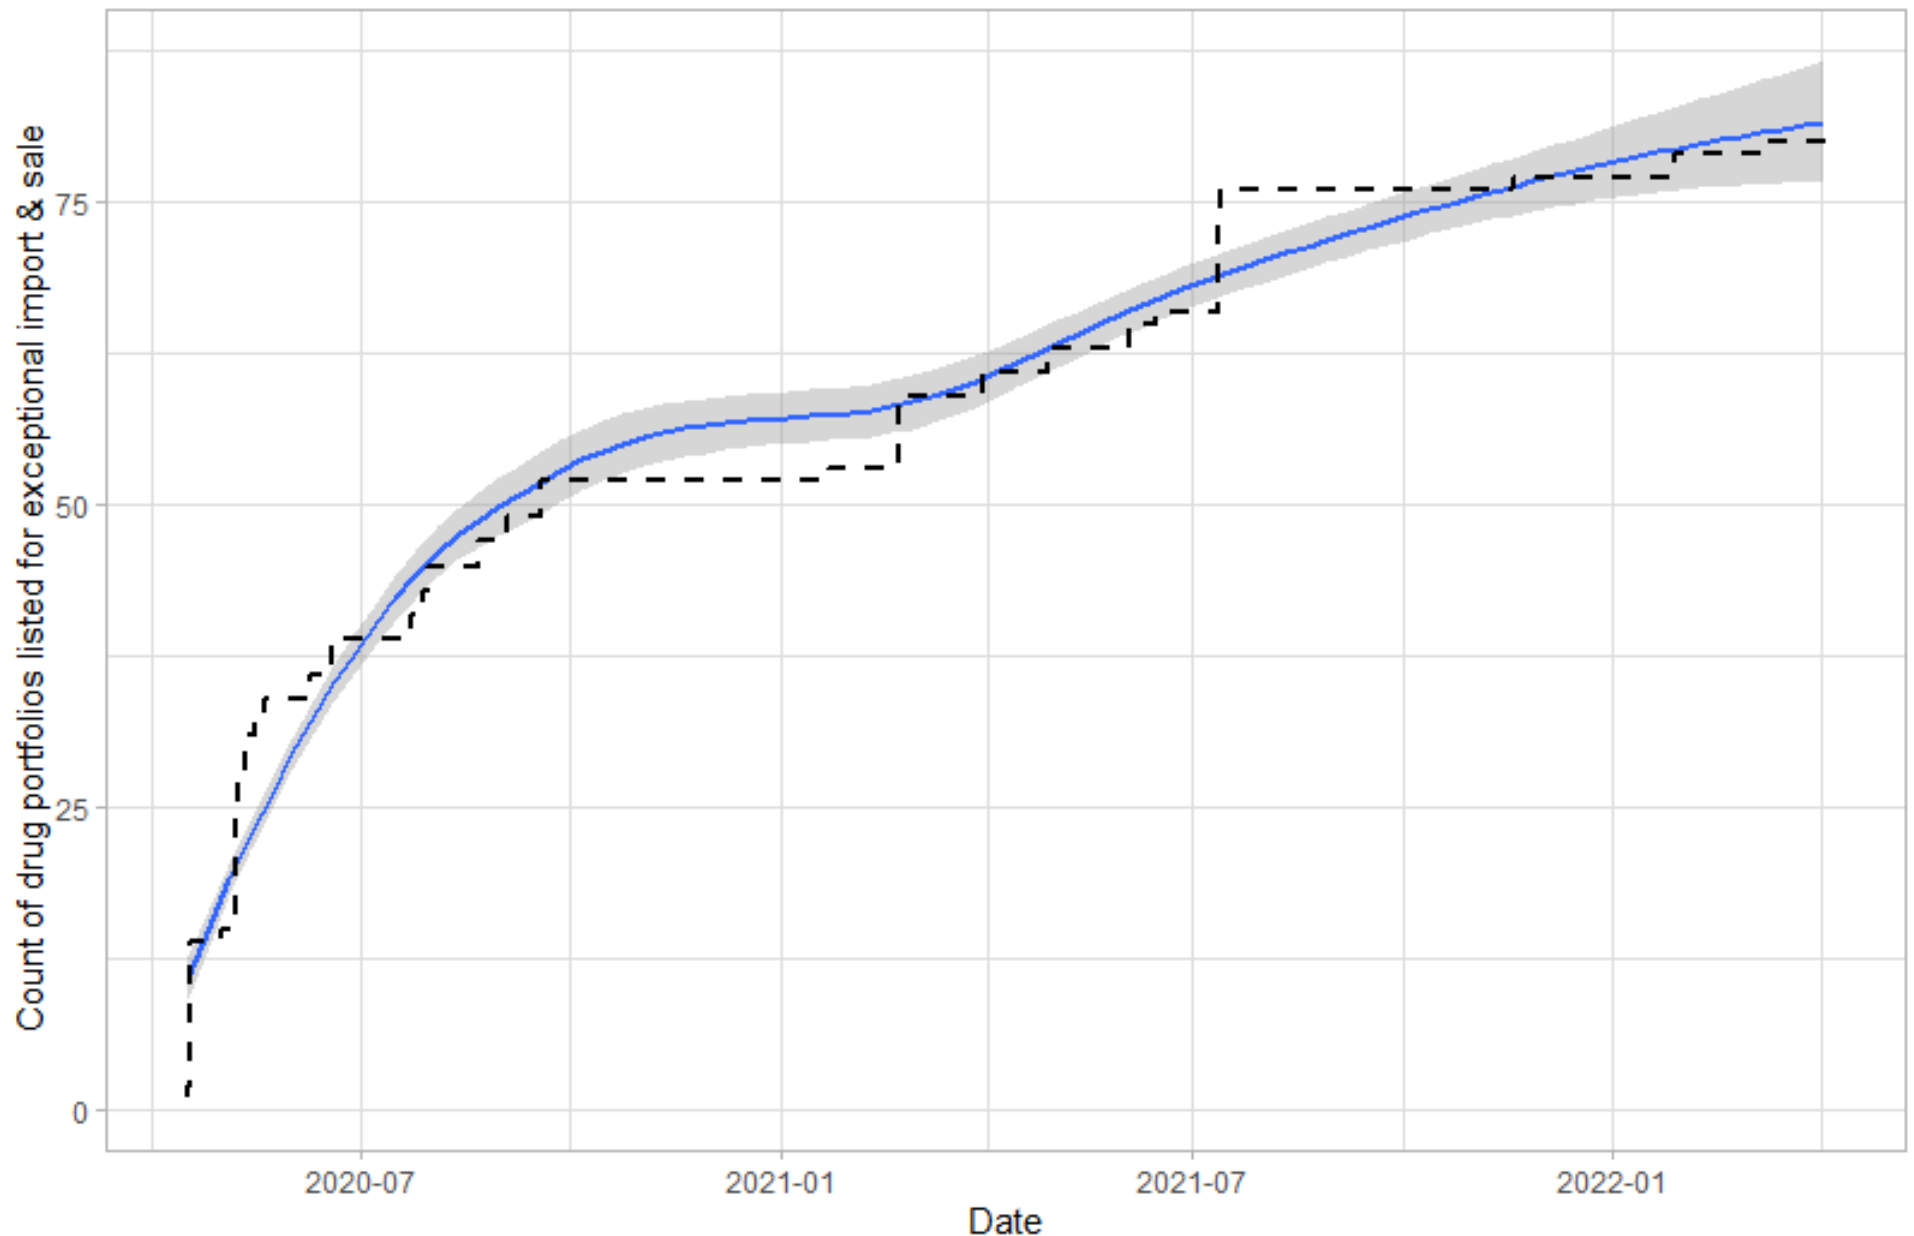

Notes: The above was generated on April 20, 2022 based on the cumulative number of records listed on the government of Canada's website for exceptional importation and sale of drugs to mitigate shortages. The dotted line is a step function indicating the cumulative total of reports with the solid line representing a smooth function of that same data with 95% confidence intervals as shading. These results show the highest level of activity was in the Summer of 2020, which roughly corresponds to when the greatest gains in drug shortages reductions occurred according to our study. These results also show that there have been periods of relatively lower activity; while less activity may contribute a slowing of progress to reduce shortages, there also may be fewer opportunities to do so. These results must be interpreted with caution as it is unknown the extent to which this list is comprehensive and up-to-date.

Appendix 1, as supplied by the authors. Appendix to: Lau B, Tadrous M, Chu C, et al. COVID-19 and the prevalence of drug shortages in Canada: a cross-sectional time-series analysis from April 2017 to April 2022. *CMAJ* 2022. doi: 10.1503/cmaj.212070. Copyright © 2022 The Author(s) or their employer(s). To receive this resource in an accessible format, please contact us at [cmajgroup@cmaj.ca](mailto:cmajgroup@cmaj.ca).
